# Supplementary material for: Orange red emitting naphthalene diimide derivative containing dendritic wedges: aggregation induced emission (AIE) and detection of picric acid (PA)
Source: Royal Society of Chemistry journal article supplement (doi:10.1039/c5ra04857e), 2015-01-01
Supplement: c5ra04857e1.pdf [file c5ra04857e1.pdf]

## Supplementary Information

### Orange Red Emitting Naphthalene Diimide Derivative Containing Dendritic Wedges: Aggregation

#### Induced Emission (AIE) and Detection of Picric acid (PA) in Aqueous Medium

P.Lasitha <sup>a</sup> and Edamana Prasad<sup>\*a</sup>

Department of chemistry , IIT -Madras, Chennai, 60036,India. \*E-mail:pre@iitm.ac.in.

#### Table of contents

1. Synthetic procedure and scheme for compounds.
2. UV-Vis and emission spectra of compound **I** and **II** at different concentration and solvents.
3. Table, quantum yield value of compounds **I-III** in different solvents.
4. UV -Vis and emission spectra by the addition water for compound **II** and **III**.
5. Lifetime plot for compounds **I-II** for the addition of different fraction of water.
6. Table, lifetime values for the addition of different fraction of water for compound **I** and **II**.
7. UV-Vis spectra of compounds **I-III** in solution and film.
8. Excitation spectra of compounds **I-III**.
9. TGA of compounds **I-III**.
10. SXRD and WXRD of **II** and **III**.
11. VTIR of compounds **I-III**.
12. VTNMR of compounds **I,III**.
13. SEM,TEM and DLS spectra of aggregates of compound **I-III**
14. CV spectra of compound **II**.

15. SEM and Lifetime plot of compound **II** before and after PA addition.

16. Spectral characterization data  $^1\text{H}$ ,  $\text{C}^{13}$  and MALDI-TOF of compounds.

#### Synthesis of compound **A**

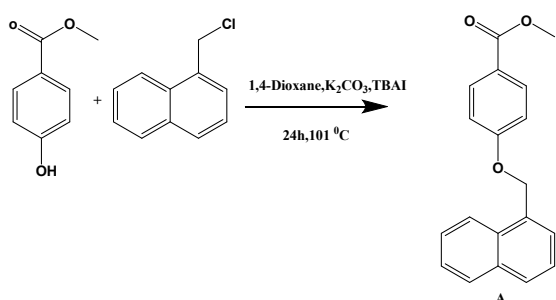

Scheme. S1 Synthetic scheme for compound **A**.

Methyl-4-dihydroxybenzoate (2 g, 0.014 mole), potassium carbonate (3.86 g, 0.027 mole) and 40 mL 1,4-dioxane were taken in a 250 mL round bottom flask. 1-chloro methyl naphthalene (3.7 g, 0.02 mole) was added followed by the addition of a catalytic amount of tertiary butyl ammonium iodide (0.48 g, 0.0013 mole). The solution mixture was refluxed for 24 hours. Solvent was evaporated and extracted with ethyl acetate water mixture. The organic layer was dried over anhydrous  $\text{Na}_2\text{SO}_4$ . The solid was then crystallized from methanol to get compound **A** (3.9 g, 91 %);  $^1\text{H}$  NMR (500 MHz,  $\text{CDCl}_3$ )  $\delta$  : 3.9 (s, 3H), 5.55 (s, 2H), 7.06 (t, 2H), 7.44-7.6 (m, 4H), 7.62 (m, 2H), 8.02 (d, 3H).  $^{13}\text{C}$  NMR (100 MHz,  $\text{CDCl}_3$ ):  $\delta$  52.07, 68.9, 114.7, 123.16, 125.4, 126.21, 126.80, 126.78, 126.88, 128.97, 129.46, 131.85, 133.99, 162.74, 167.01. IR (KBr)  $\nu$  = 1925, 1874, 1787, 1701, 1650, 1629, 1535, 1513, 1477, 1383, and 1318  $\text{cm}^{-1}$ .

#### Synthesis of compound **A-1**

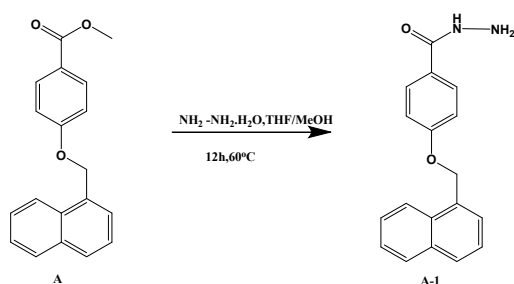

Scheme .S2 Synthetic scheme for compound **A-1**.

Compound **A** (2.5g, 0.008 mole) and hydrazine monohydrate (19.40 mL, 0.4 mole) were dissolved in MeOH (30 mL) and THF (15 mL). The reaction mixture was stirred at 60 °C for 12 hours. After the reaction mixture was cooled to room

temperature, solvent was evaporated by applying vacuum. The residue was dissolved in DCM and washed many times with water to remove excess of hydrazine mono hydrate. The organic layer was then dried over anhydrous  $\text{Na}_2\text{SO}_4$ . Crude product was purified by column chromatography ethyl acetate /Hexane (3:7)mixture as eluent. ( 2.2 g, 88% );  $^1\text{H NMR}$  (500 MHz,  $\text{CDCl}_3$ ) : $\delta$  3.37 (s,2H), 5.49(s,2H),7.03(s,2H),7.43-7.59(m,4H) ,7.73(d,2H), 7.87(m,2H), 7.89(d,1H).  $^{13}\text{C NMR}$  (100 MHz, $\text{CDCl}_3$ ) : $\delta$  68.80, 114.91, 123.51, 125.31, 126.04, 126.61, 126.70, 128.77, 129.29, 131.43, 131.58, 133.81, 161.73, 168.30.IR(KBr)  $\nu$  =3209, 3050, 2920, 2476,1790, 1761, 1718, 1682, 1610, 1581, 1538,1509,1451,1386 and 1314  $\text{cm}^{-1}$ . ESI-MS : m/z Calcd for  $\text{C}_{18}\text{H}_{16}\text{N}_2\text{O}_2$ :292.33, found: 293[M+H] $^+$ .

### Synthesis of compound B

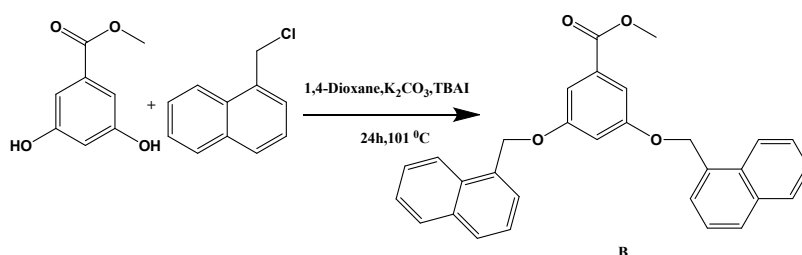

Scheme.S2 Synthetic scheme for compound B.

Methyl-3, 5-dihydroxybenzoate (2 g, 0.0118 mole) , potassium carbonate (4.8 g, 0.035 mole) and 40 mL of 1,4-dioxane were taken in 250 mL round bottom flask. 1-chloro methyl naphthalene (5.25 g, 0.0297 mole) was added followed by the addition of a catalytic amount of tertiary butyl ammonium iodide (0.5 g, 0.0013 mole). The solution mixture was refluxed for 24 hours. Solvent was evaporated and extracted with ethyl acetate water mixture . The organic layer was dried over anhydrous  $\text{Na}_2\text{SO}_4$ . The solid was crystallized from methanol to get **B** (4.8,86 %);  $^1\text{H NMR}$  (500 MHz, $\text{CDCl}_3$ ):  $\delta$  3.86 (s, 3H), 5.43 (s, 4H), 7.87 (d, 1H), 7.37-7.54 (m ,10H),7.82 (m,4H),7.97(s,2H).  $^{13}\text{C NMR}$  (100 MHz,  $\text{CDCl}_3$ ):  $\delta$  52.34,69.04,107.43,108.63,123.71,125.35,126.02,126.59,126.80,128.77,129.25,131.59,131.88,132.29,133.85,160.0,166.85.IR(KBr)  $\nu$  = 3138, 2490, 1719, 1513, 1433, 1367, 1315, 1263, 1155 and 1042  $\text{cm}^{-1}$ . ESI-MS: m/z Calcd for  $\text{C}_{30}\text{H}_{24}\text{O}_4$ :448.51, found: 471[M +Na] $^+$ .

### Synthesis of compound B-1

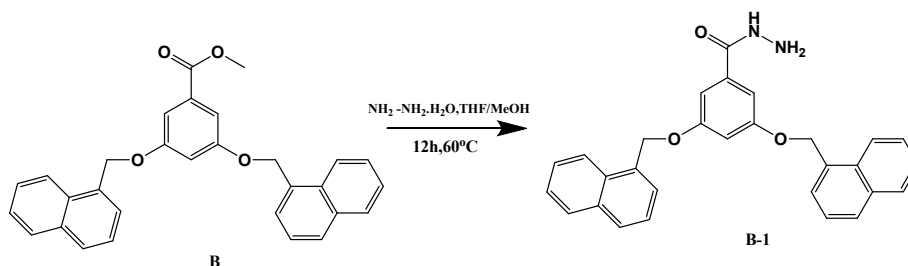

Scheme.S3 Synthetic scheme for compound B-1.

Compound **B** (2 g, 0.0044 mole) and hydrazine monohydrate (10.8 mL, 0.22 mole) were dissolved in MeOH (30 mL) and THF (15 mL). The reaction mixture was stirred at  $60^\circ\text{C}$  for 12 hours. After the reaction mixture was cooled to room temperature, solvent was evaporated by applying vacuum. The residue was dissolved in DCM and washed many times with

water to remove excess of hydrazine mono hydrate. The organic layer was then dried over anhydrous  $\text{Na}_2\text{SO}_4$ . Crude product was purified by column chromatography ethyl acetate /Hexane (3:7) mixture as eluent. ( 1.8 g, 90% );  $^1\text{H NMR}$  (500 MHz,  $\text{CDCl}_3$ ):  $\delta$  4.04 (s,2H), 5.34(s,4H), 6.85(t,1H), 7.08(d,2H),7.42(t,2H), 7.49-7.53(m,6H),7.57(s,2H),7.81-7.87 (m,2H), 7.96 (d,2H).  $^{13}\text{C NMR}$  (100 MHz, $\text{CDCl}_3$ ): $\delta$  69.02,105.7, 106.19,123.62, 125.32 ,126.0, 126.6, 126.7, 128.7, 129.2, 131.51, 133.82, 134.9,137.1,160.26,168.42.IR(KBr)  $\nu$  = 3345, 3131, 2490, 1825, 1767, 1686, 1628, 1554, 1458, 1379 and 1281  $\text{cm}^{-1}$ . ESI-MS : m/z Calcd for  $\text{C}_{29}\text{H}_{24}\text{N}_2\text{O}_3$ :448.51, found: 471[M+Na] $^+$ .

### Synthesis of compound C

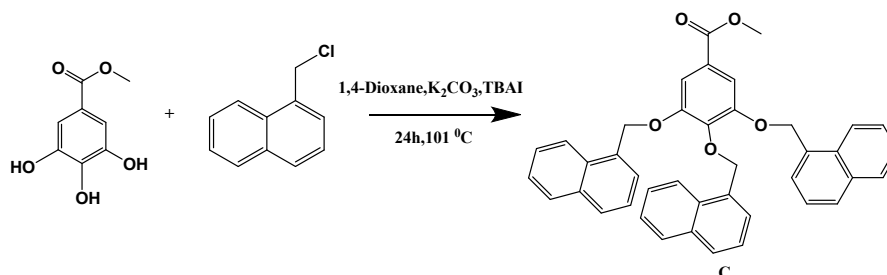

Scheme. S4 Synthetic scheme for compound C.

Methyl-3,4, 5-dihydroxybenzoate (3 g, 0.016 mole) ,potassium carbonate (13.5g, 0.097mole) and 100 mL of 1,4-dioxane were taken in 250 mL round bottom flask . 1-chloro methyl naphthalene (9.89 g, 0.055 mole) was added followed by the addition of a catalytic amount of tertiary butyl ammonium iodide (0.59 g, 0.0016 mole). The solution mixture was refluxed for 24 hours. . Solvent was evaporated and extracted with ethyl acetate water mixture . The organic layer was dried over anhydrous  $\text{Na}_2\text{SO}_4$ . The solid was crystallized from methanol to get C ( 8.4 g,86 %); $^1\text{H NMR}$  (500 MHz, $\text{CDCl}_3$ ): $\delta$  4.12 (s, 3H), 5.5(s,2H),5.7(s,4H)6.7(t,1H),7.38(t,2H),7.59-7.68(m,7H),7.76-7.84(m,7H),8.02(m,5H),8.29(d,2H). $^{13}\text{CNMR}$  (100MHz,  $\text{CDCl}_3$ ): $\delta$  52.33, 69.90, 73.28, 109.07, 123.84, 124.38, 124.91, 125.37, 125.44, 125.56, 125.62, 125.76, 125.96,126.12,126.59,127.05,127.32,127.9,128.69,128.75,129.17,131.83,132.03,132.86,133.41,133.81,142.59,153.07,166.74.IR(KBr)  $\nu$  =3131,3042,2969,24821885,1768,1694,1627,1576,1526,1475,1418,1324,and1224  $\text{cm}^{-1}$ .ESI-MS : m/z Calcd for  $\text{C}_{41}\text{H}_{32}\text{O}_5$ : 604.69, found: 627[M+Na] $^+$ .

### Synthesis of compound C-1

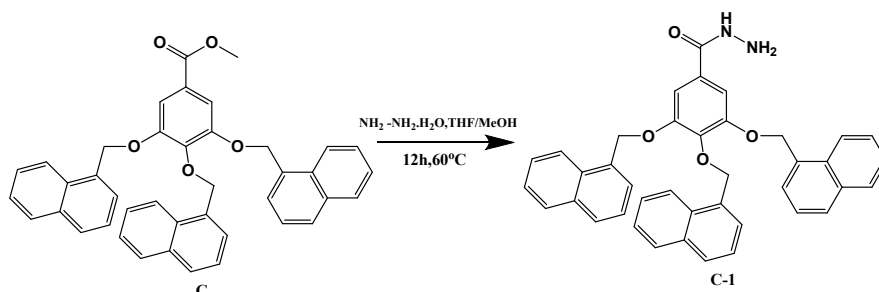

Scheme. S5 Synthetic scheme for compound C-1.

Compound C (2 g, 0.0033 mole) and hydrazine monohydrate (8.0 mL, 0.165 mole) were dissolved in MeOH (30 mL) and THF (15 mL). The reaction mixture was stirred at 60°C for 12 hours. After the reaction mixture was cooled to room

temperature, solvent was evaporated by applying vacuum. The residue was dissolved in DCM and washed many times with water to remove excess of hydrazine mono hydrate. The organic layer was then dried over anhydrous  $\text{Na}_2\text{SO}_4$ . Crude product was purified by column chromatography 30 % ethyl acetate/Hexane (3:7) mixture as eluent. (1.8g,90%).  $^1\text{H NMR}$ (500 MHz,  $\text{CDCl}_3$ ):  $\delta$  3.1(s,2H)5.3 (s,2H), 5.52 (s,4H), 7.07(t,2H), 7.2(s,1H), 7.26(s,2H),7.3-7.53 (m,9H),7.65(m,3H)7.8-7.8 (m,5H),8.05(d,2H).  $^{13}\text{C NMR}$  (100MHz, $\text{CDCl}_3$ ): $\delta$  70.03,73.35,106.85,123.7, 124.3, 124.9, 125.35, 125.48, 125.9, 126.62, 126.9, 127.39,127.94,128.71,128.83,129.19,131.55,137.85,131.89,132.79,133.42,133.78,141.71,153.35,. IR(KBr)  $\nu$  =3323, 3116, 2497, 1812, 1752, 1693, 1621, 1534, 1464 and 1381  $\text{cm}^{-1}$ .ESI-MS: m/z Calcd for  $\text{C}_{40}\text{H}_{32}\text{N}_2\text{O}_4$ : 604.69, found: 627[M+Na] $^+$ .

### Synthesis of compound I

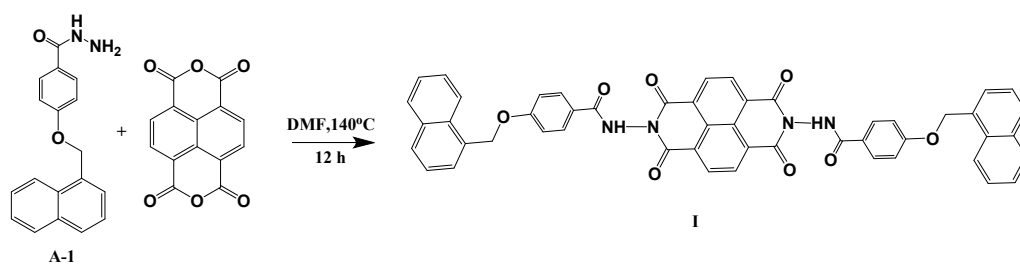

Scheme .S6 Synthetic scheme for compound I.

Naphthalene dianhydride (1 g, 0.0037 mole) and **A-1**(2.48, 0.0085) were taken in 30 mL of dry DMF and was heated to 140  $^{\circ}\text{C}$  for 12 hours. The reaction mixture was allowed to cool down to room temperature. The reaction mixture was extracted with DCM and washed many times with water. Organic layer was then dried over anhydrous  $\text{Na}_2\text{SO}_4$ . Solvent The crude product was then purified by column chromatography methanol / $\text{CHCl}_3$  (1:9) mixture as eluent to obtain a brown coloured powder (2.5g, 82% yield).  $^1\text{H NMR}$  (500 MHz,  $\text{DMSO-d}_6$ ): $\delta$  5.71(s,4H),7.35(d,4H),7.5-7.65 (m,6H), 7.4(d,2H), 7.9-8.1 (m,14H), 8.8(s,4H), 11.4 (d,2H).  $^{13}\text{C NMR}$  (100MHz,  $\text{DMSO-d}_6$ ):  $\delta$  68.0, 114.86, 123.81, 123.36, 126.01, 126.5, 126.77,128.49,128.81,129.86,131.05,131.53,131.61,131.97,133.26,160.84,161.83,164.66. IR(KBr)  $\nu$  =3586, 3277, 3052, 1728, 11690, 1658, 1601, 1508, 1540,1500,1419,1381 and 1355, 1280, 1243, 1202, 1173,1124,1098  $\text{cm}^{-1}$ . MS (MALDI-TOF) :m/z Calcd for  $\text{C}_{50}\text{H}_{32}\text{N}_4\text{O}_8$ : 816.81, found: 839.26[M+Na] $^+$ .

### Synthesis of compound II

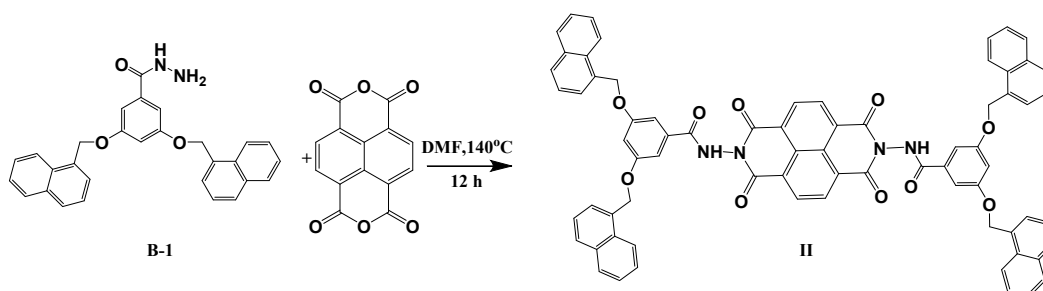

Scheme .S7 Synthetic scheme for compound II.

Naphthalene dianhydride (1 g, 0.0037 mole) and **B-1**(3.8g, 0.0085) were taken in 30 mL of dry DMF and was heated to 140  $^{\circ}\text{C}$  for 12 hours. The reaction mixture was allowed to cool down to room temperature. The reaction mixture was extracted with DCM and washed many times with water. Organic layer was then dried over anhydrous  $\text{Na}_2\text{SO}_4$ . The crude product was then purified by column chromatography methanol/ $\text{CHCl}_3$ (1:9) to obtain a yellowish brown powder (3.4 g, 81% yield).  $^1\text{H NMR}$  (500 MHz,  $\text{DMSO-d}_6$ ):  $\delta$  5.6(s,8H),7.1(s,1H),7.3(s,4H)8.7(s,4H),7.4-7.56 (m,12H),7.66(m,5H),7.8-7.9(m,10H),8.07(m,5H),8.6(d,4H),11.5(d,2H).  $^{13}\text{C NMR}$  (100 MHz, $\text{DMSO-d}_6$ ): $\delta$  68.77, 70.5, 107.51, 124.2, 125.8, 126.53, 127.0,

128.79, 129.63, 131.8, 132.47, 133.98, 141.68, 160.2, 161.2. IR(KBr)  $\nu$  = 3374, 3131, 2999, 1899, 1862, 1767, 1694, 1629, 1548, 1505, 1446, 1369 and 1265  $\text{cm}^{-1}$ . MS (MALDI-TOF) :  $m/z$  Calcd for  $\text{C}_{72}\text{H}_{48}\text{N}_3\text{O}_{11}$ : 1129.17, found: 1151.54[M + Na]<sup>+</sup>.

### Synthesis of compound III

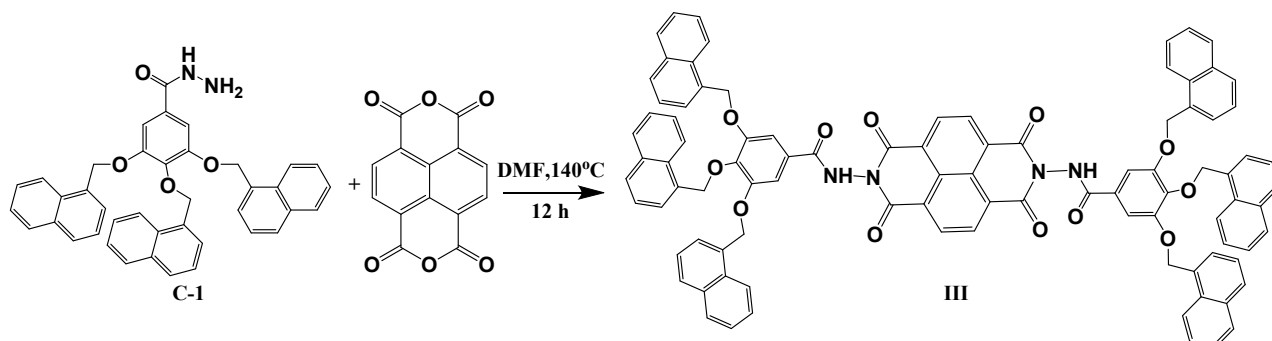

Scheme. S8 Synthetic scheme for compound III.

Naphthalene dianhydride (1.5 g, 0.0056 mole) and **C-1** (7.77 g, 0.0128 mole) were taken in 30 mL of dry DMF and was heated to 140 °C for 12 hours. The reaction mixture was extracted with DCM and washed many times with water. Organic layer was then dried over anhydrous  $\text{Na}_2\text{SO}_4$ . The crude product was then purified by column chromatography methanol/ $\text{CHCl}_3$  (1:9) to obtain a dark brown powder (6.5 g, 80 % yield). <sup>1</sup>H NMR (500 MHz, DMSO- $d_6$ ) :  $\delta$  5.2 (s, 4H), 5.74 (s, 8H), 6.39 (t, 2H), 6.96 (d, 2H), 7.08 (t, 2H), 7.25 (t, 2H), 7.54 (s, 14H), 7.75-7.8 (t, 2H), 8 (s, 9H), 8.23 (s, 5H), 8.84 (s, 4H), 11.63 (d, 2H), (d, 2H). <sup>13</sup>C NMR (100 MHz, DMSO- $d_6$ ) :  $\delta$  72.41, 107.01, 124.0, 124.2, 124.7, 125.41, 126.0, 126.56, 127.18, 127.82, 128.48, 128.66, 128.9, 131.2, 131.29, 132.19, 132.5, 132.87, 133.39, 140.38, 152.7, 160.99, 164.58. IR(KBr)  $\nu$  = 3359, 3142, 2991, 2478, 1908, 1872, 1764, 1684, 1619, 1525, 1446, 1410, and 1316  $\text{cm}^{-1}$ . MS (MALDI-TOF) :  $m/z$  Calcd for  $\text{C}_{94}\text{H}_{64}\text{N}_3\text{O}_{13}$ : 1441.53, found: 1464.268[M + Na]<sup>+</sup>.

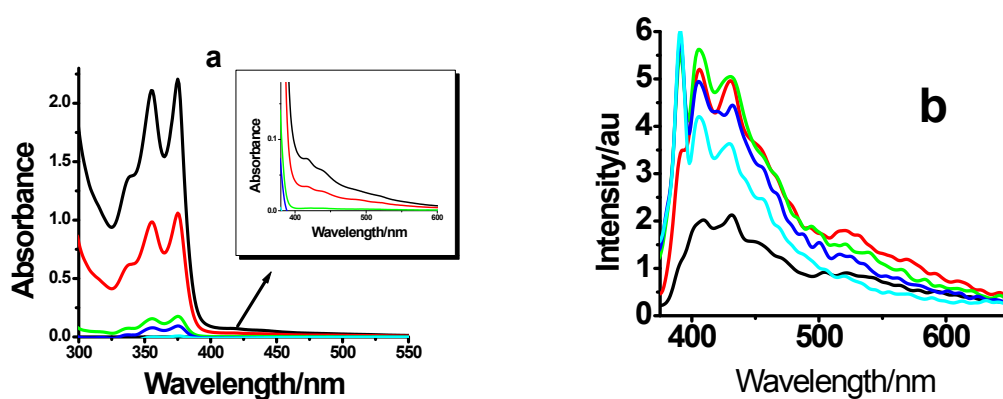

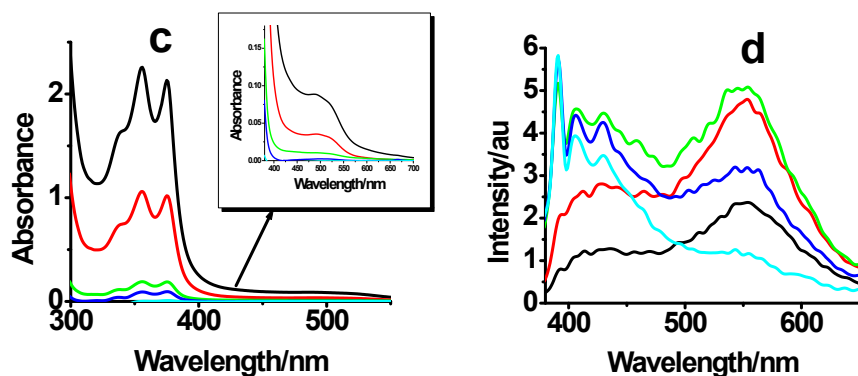

Fig. S1 UV-Vis and emission spectra of compound **II** (a,b) and **III** (c,d) in THF at different concentrations; black- $10^{-4}$  M, red- $0.5 \times 10^{-4}$  M, green- $10^{-5}$  M, sky blue - $0.5 \times 10^{-5}$  M and navy blue- $10^{-6}$  M, (Inset of a shows enlarged UV spectra from 400 nm-700 nm).

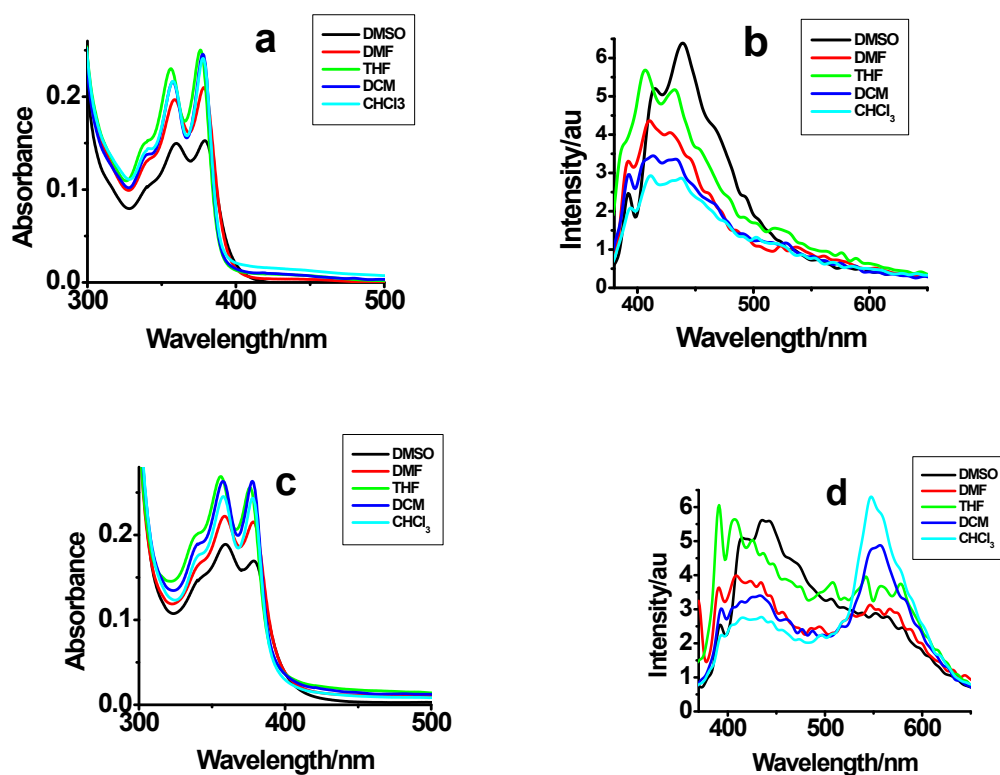

Fig. S2 UV-Vis and emission spectra of compound **II** (a, b) and compound **III** (c, d) [ $2 \times 10^{-5}$  M] in different solvents;  $\lambda_{\text{ex}} = 350$  nm.

Table S1: Quantum yield measurement of compound **I-III** in different solvents with quinine sulphate  $10^{-5}$  M in 0.05 N

$\text{H}_2\text{SO}_4$  as standard ( $\phi_R = 0.6 \pm 2$ ) (Error % ;  $\pm 5$ )

| Solvent           | $\lambda_{max}$ (nm) | $\lambda_{max}$ (nm) | $\phi_f$ ( $\times 10^{-3}$ ) |
|-------------------|----------------------|----------------------|-------------------------------|
| Compound I        |                      |                      |                               |
| DMSO              | 378                  | 391                  | 6.78                          |
| DMF               | 379                  | 438                  | 3.42                          |
| THF               | 376                  | 405                  | 3.0                           |
| DCM               | 378                  | 392                  | 2.27                          |
| CHCl <sub>3</sub> | 378                  | 427                  | 2.09                          |
| Compound II       |                      |                      |                               |
| DMSO              | 375                  | 442                  | 6.3                           |
| DMF               | 375                  | 410                  | 5.03                          |
| THF               | 372                  | 409                  | 5.78                          |
| DCM               | 374                  | 426                  | 2.28                          |
| Chloroform        | 374                  | 422                  | 1.28                          |
| Compound III      |                      |                      |                               |
| DMSO              | 378                  | 437                  | 8.99                          |
| DMF               | 378                  | 409                  | 7.5                           |
| THF               | 375                  | 407                  | 7.8                           |
| DCM               | 377                  | 555                  | 2.61                          |
| Chloroform        | 377                  | 547                  | 2.77                          |

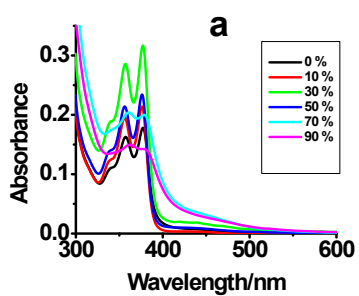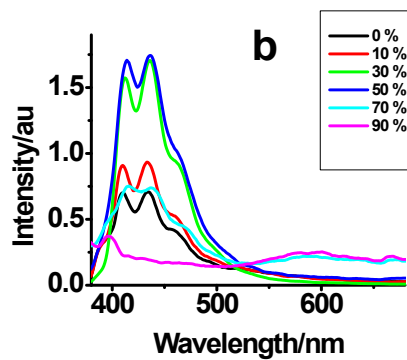



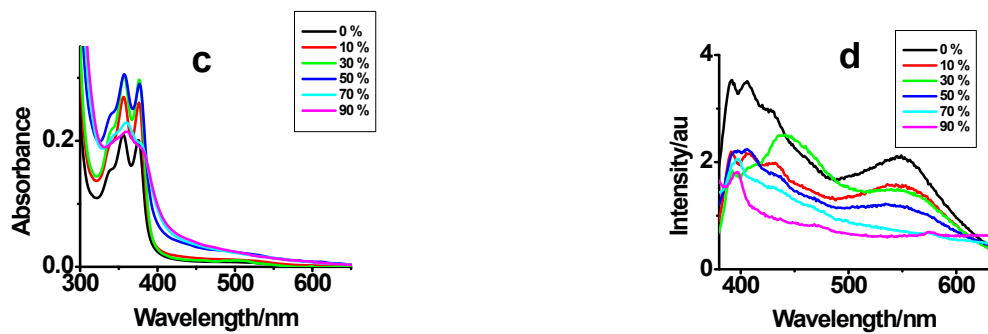

Fig.S3 UV-Vis and emission spectra of compound I (a, b) and compound III (c, d) in THF( $10^{-5}$  M) with different water fraction,  $\lambda_{ex}$ ; 350 nm.

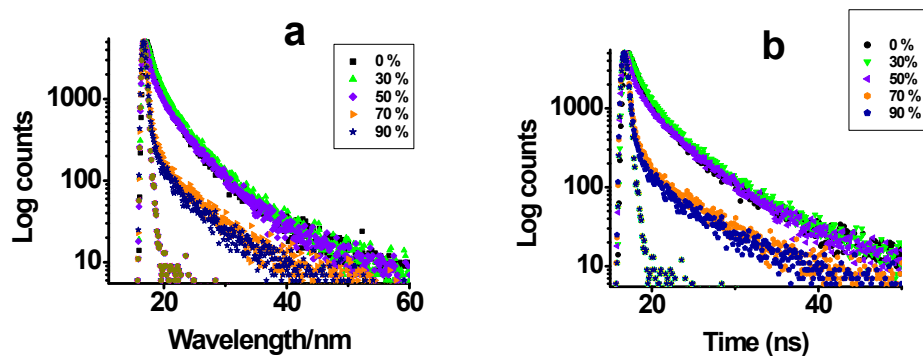

Fig. S4 Lifetime plot for compound I (a), compound II (b) and compound III (c) in THF( $10^{-5}$  M) with different water fraction,  $\lambda_{ex}$ ; 340 nm.

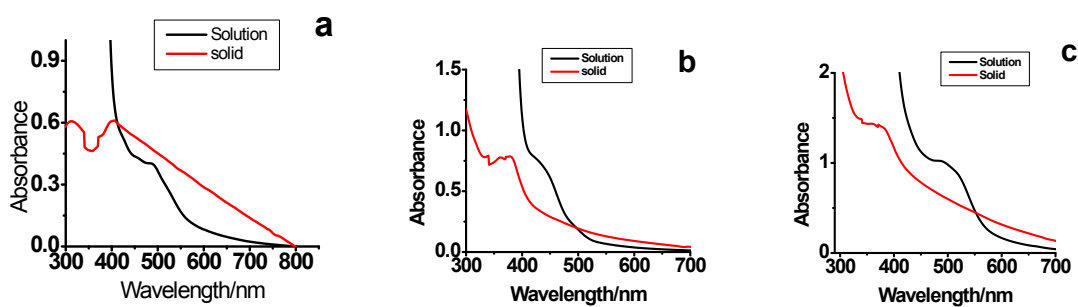

Fig. S5 UV-VIS spectra of compound I (a) II (b) and III (c) [ $10^{-3}$ M] in solution and film state.

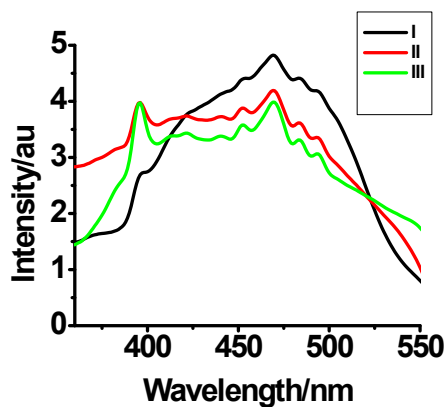

Fig.S6 Excitation spectra of compounds **I-III** in the film state emission collected at 590 nm .

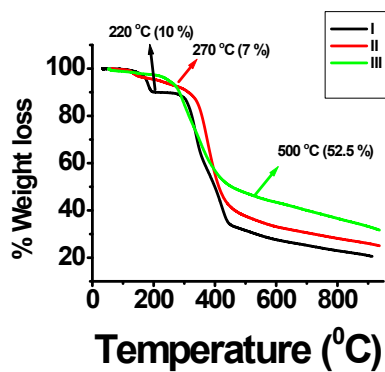

Fig. S7 TGA thermogram of compound **I-III**.

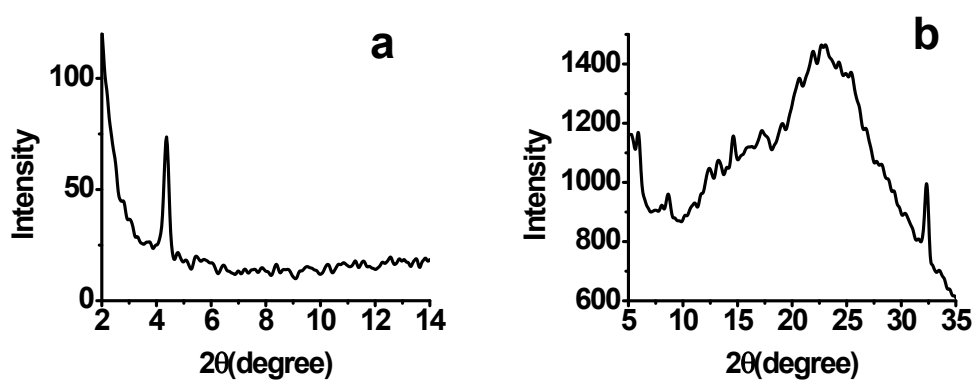

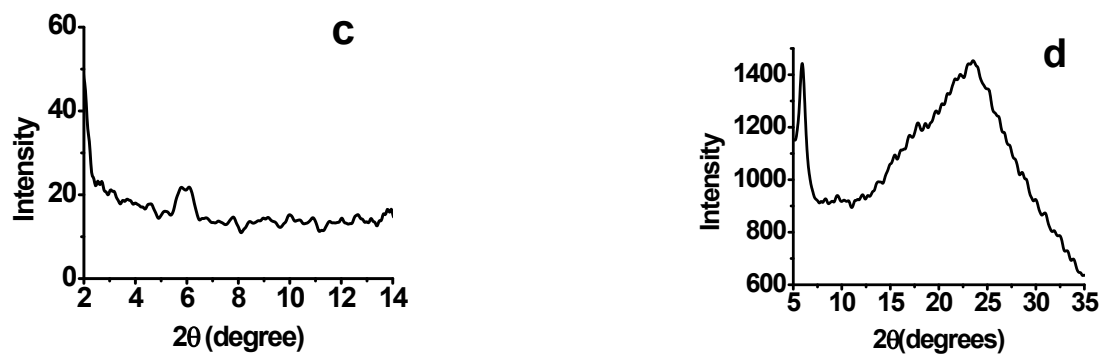

Fig. S8 SXRd ,WXRd pattern of compound **II**(a,b) and compound **III** (c,d).

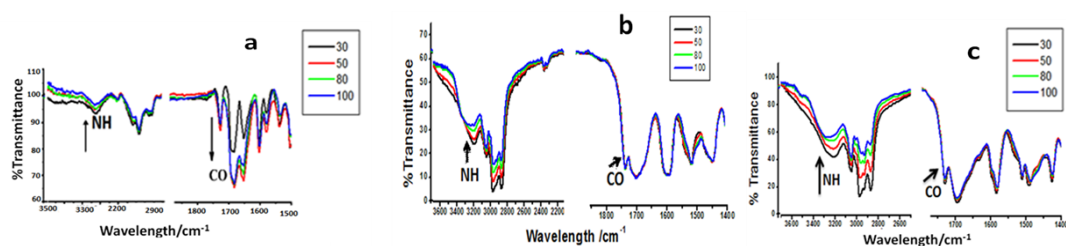

Fig S9 VT-FTIR spectra of compound **I** (a) and compound **III** (b).

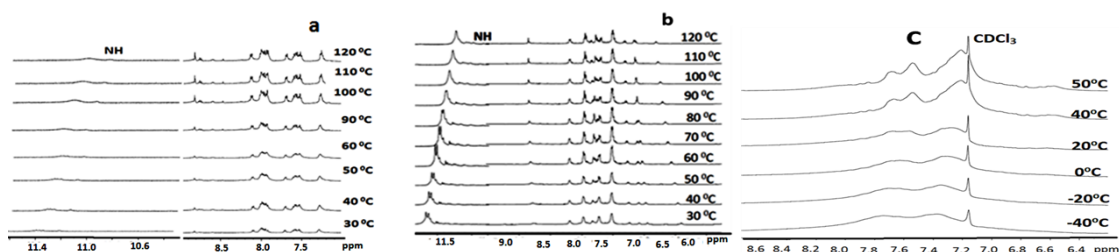

Fig. S10 variable temperature NMR spectra of compound **I** [ $1.7 \times 10^{-2}$  M] (a) and compound **II** [ $3.5 \times 10^{-2}$  M] (b) in DMSO- $d_6$  from 30°C to 120°C. variable temperature NMR spectra of compound **II** [ $5.3 \times 10^{-3}$  M] in  $CDCl_3$  from -40°C to 50°C .

Table .S2 :Lifetime values for compounds **I-II** for the addition of different fraction of water.

| Comp.     | % water | Lifetime ( $\tau$ )(ns) | R.A(%)       | CIHQ |
|-----------|---------|-------------------------|--------------|------|
| <b>I</b>  | 0       | 2.50, 9.22              | 46.4, 20.14  | 1.31 |
|           | 30      | 1.9, 9.06               | 43.63, 34.60 | 1.31 |
|           | 50      | 2.1, 10.03              | 43.47, 34.19 | 1.4  |
|           | 70      | 1.4, 8.97               | 37.13, 30    | 1.4  |
|           | 90      | 1.6, 8.8                | 19.80, 21.06 | 1.3  |
| <b>II</b> | 0       | 2.38, 7.78              | 44.34, 25.67 | 1.04 |
|           | 30      | 3.11, 10.09             | 54.59, 18.27 | 1.13 |
|           | 50      | 1.40, 5.34              | 17.69, 31.89 | 1.20 |
|           | 70      | 5.33                    | 17.50        | 1.67 |
|           | 90      | 5.67                    | 12.45        | 1.42 |

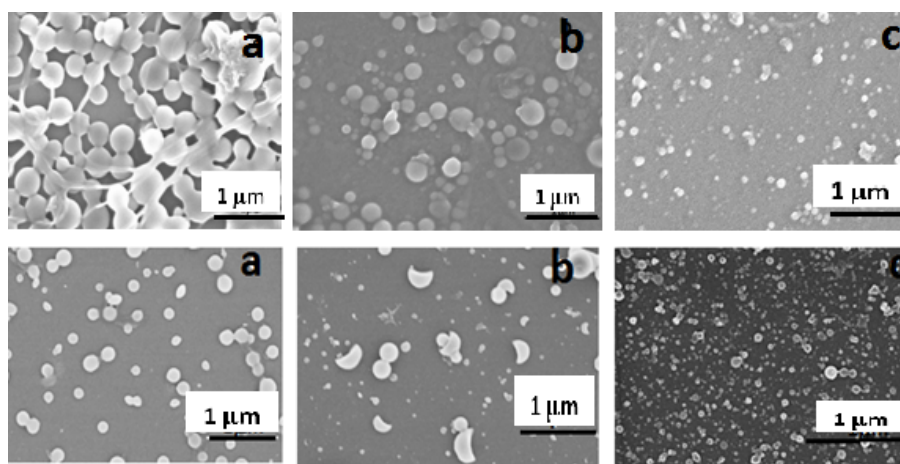

Fig .S11 SEM images of compound **I** (above) and compound **III** (below) with different fraction of water a) 30% water, b) 50% , and c)90% water.

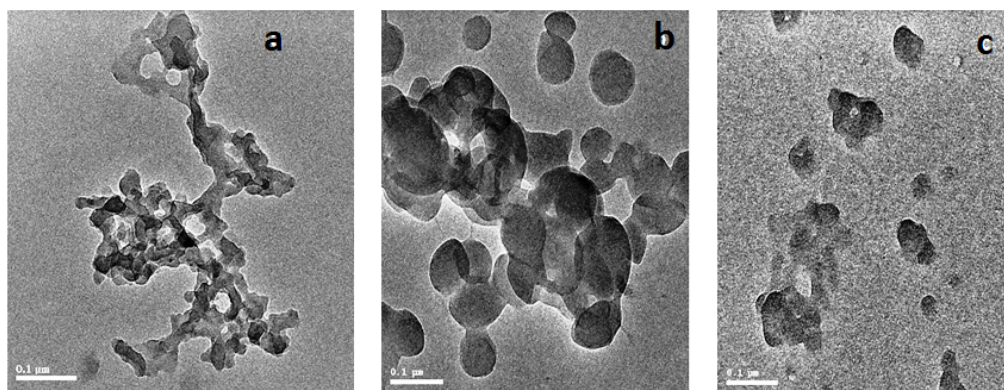

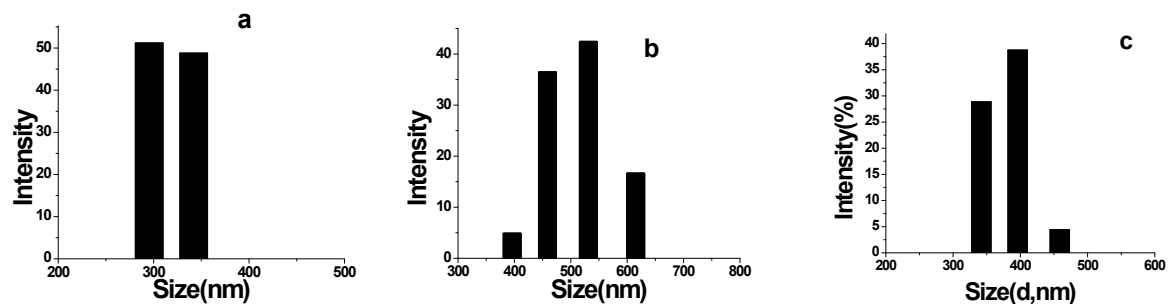

Fig. S12 (Above)TEM images of compound **I** (a), compound **II** (b), and compound **III** (c) with 90% water fraction (scale 0.1 $\mu$ m). (Below) DLS spectra of compound a) **I** b) **II** and c) **III** with 90% water fraction ( $10^{-5}$ M).

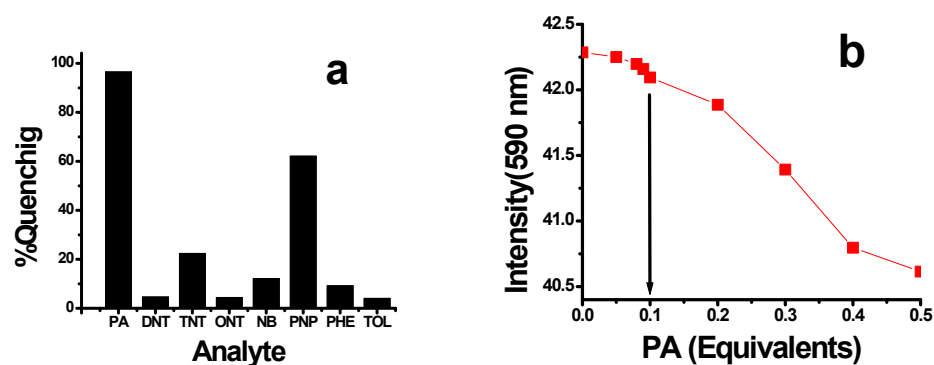

Fig. S13 Quenching percentage and selectivity for different analytes (a). Fluorescence intensity at 590 nm for the addition of different equivalent of PA (b).

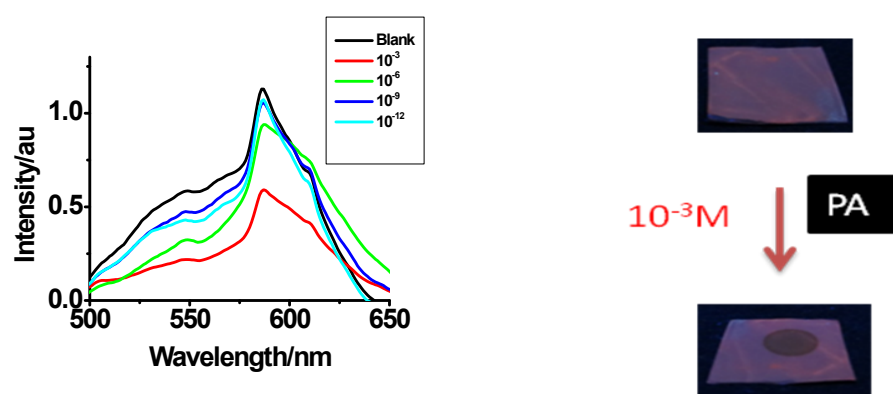

Fig. S14 (Left) Detection of PA in film for compound **II**. (Right) photographs showing quenching in luminescence by the addition of  $10^{-3}$  M PA on TLC stripes under UV illumination.

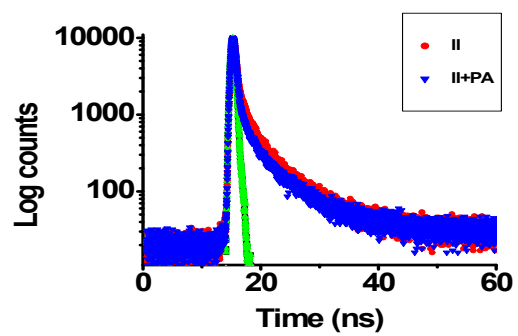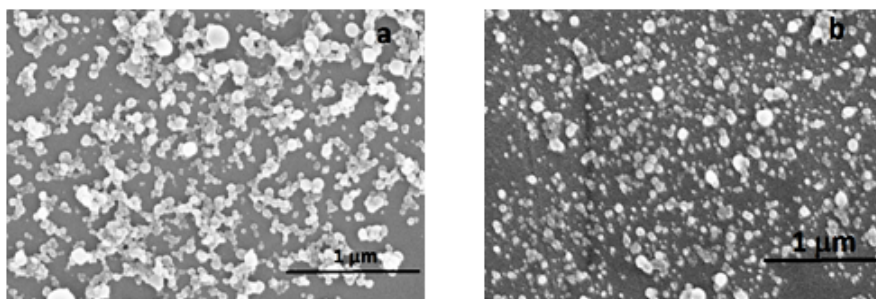

Fig. S15(Above) Lifetime plot for compound II before and after addition of PA. (Below)SEM images of compound II THF /Water(1:9) (a), after the addition of PA (b).

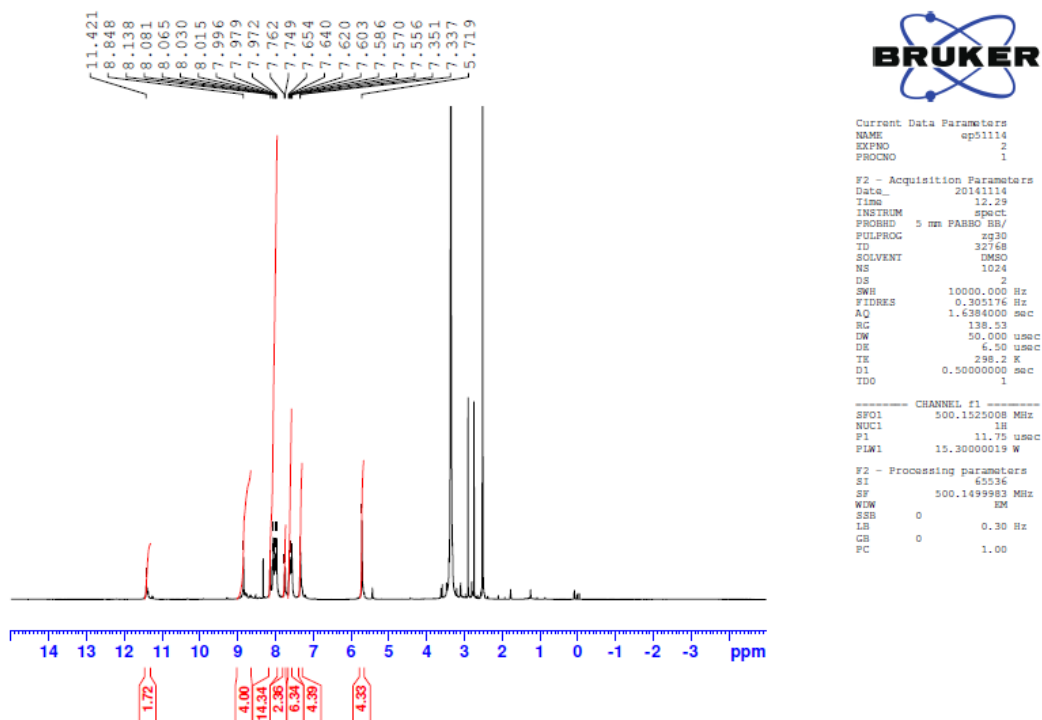

Fig. S 16 <sup>1</sup>H- NMR spectra of **I** DMSO-d<sub>6</sub>.

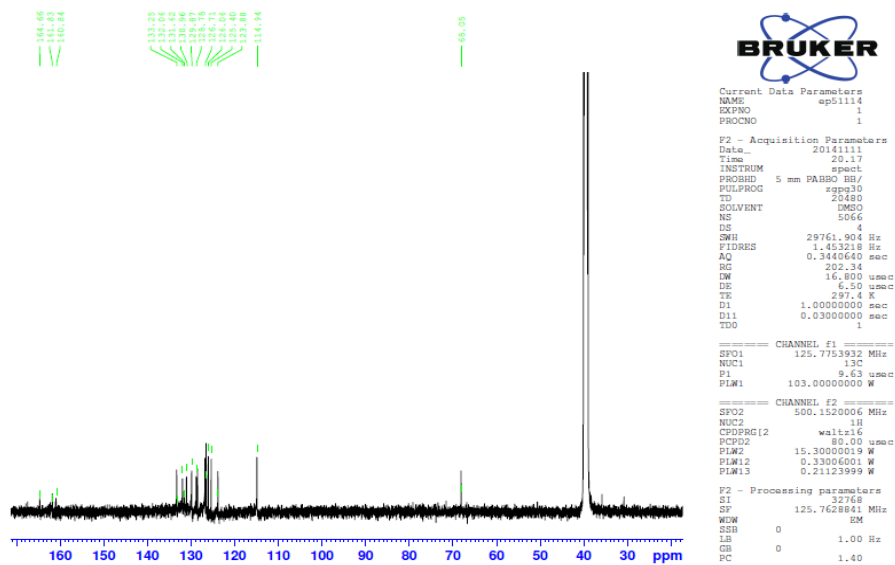

Fig. S 17 <sup>13</sup>CNMR spectra of **I** DMSO-d<sub>6</sub>.

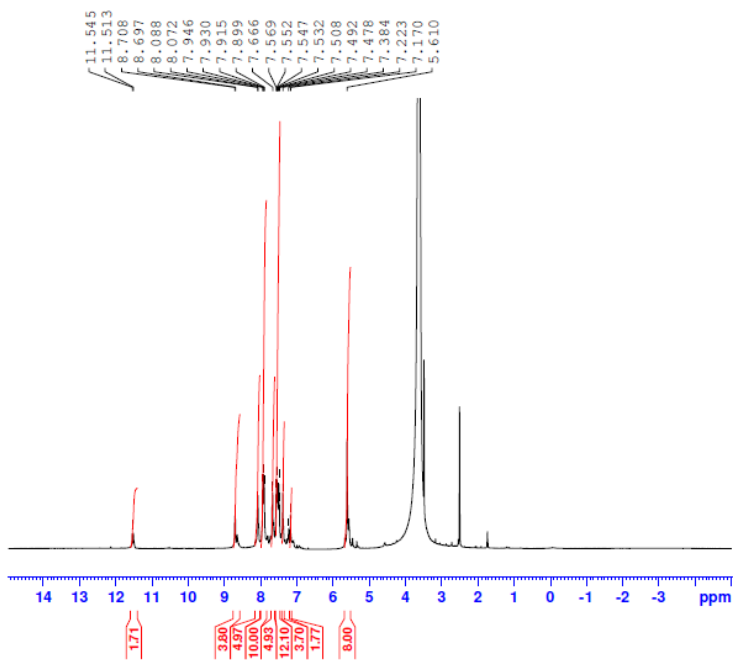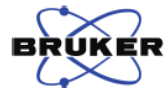

```

Current Data Parameters
NAME      ep50814
EXPNO    9
PROCNO   1

F2 - Acquisition Parameters
Date_    20140819
Time     18.33
INSTRUM  spect
PROBHD   5 mm PABBO BB/
PULPROG  zg30
TD       32768
SOLVENT  DMSO
NS       32
DS       2
SWH      10000.000 Hz
FIDRES   0.305176 Hz
AQ       1.6384000 sec
RG       31.24
DW       50.000 usec
DE       6.50 usec
TE       299.2 K
D1       0.50000000 sec
TD0      1

===== CHANNEL f1 =====
SFO1     500.1525008 MHz
NUC1     1H
P1       11.75 usec
PLW1     15.30000019 W

F2 - Processing parameters
SI       65536
SF       500.1500106 MHz
WDW      EM
SSB      0
LB       0.30 Hz
GB       0
PC       1.00
  
```

Fig. S 18 <sup>1</sup>H-NMR spectra of **II** DMSO-d<sub>6</sub>.

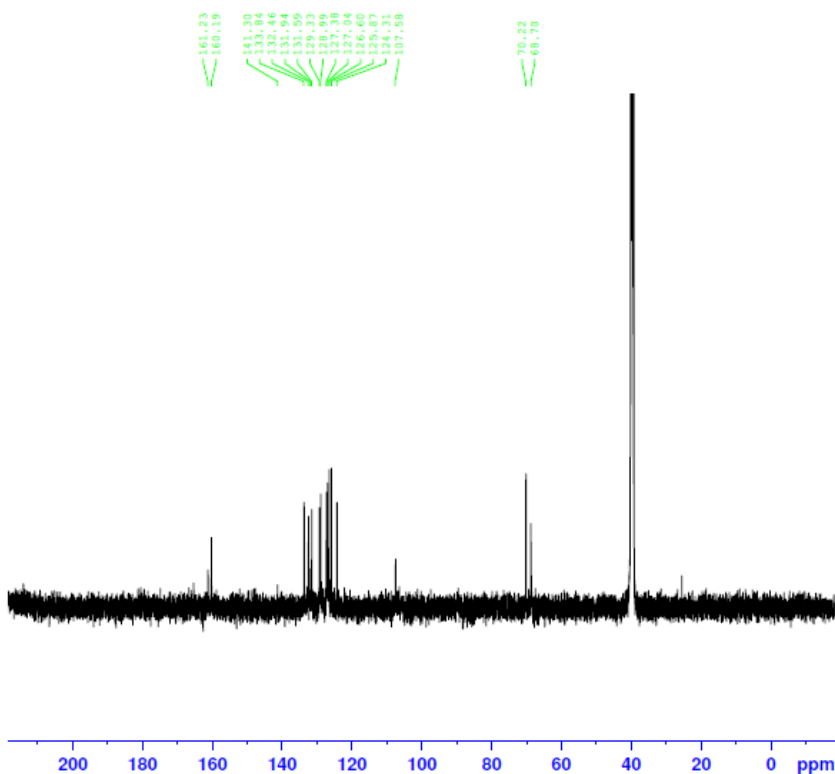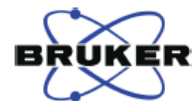

```

Current Data Parameters
NAME      ep50814
EXPNO    10
PROCNO   1

F2 - Acquisition Parameters
Date_    20140819
Time     18.47
INSTRUM  spect
PROBHD   5 mm PABBO BB/
PULPROG  zgpg30
TD       20480
SOLVENT  DMSO
NS       512
DS       4
SWH      29761.904 Hz
FIDRES   1.453218 Hz
AQ       0.3440640 sec
RG       202.34
DW       16.800 usec
DE       6.50 usec
TE       300.0 K
D1       1.00000000 sec
D11      0.03000000 sec
TD0      1

===== CHANNEL f1 =====
SFO1     125.7753932 MHz
NUC1     13C
P1       9.63 usec
PLW1     103.00000000 W

===== CHANNEL f2 =====
SFO2     500.1520006 MHz
NUC2     1H
CPDPRG2  waltz16
PCPD2    80.00 usec
PLW2     15.30000019 W
PLW12    0.33006001 W
PLW13    0.21123999 W

F2 - Processing parameters
SI       32768
SF       125.7628180 MHz
WDW      EM
SSB      0
LB       1.00 Hz
GB       0
PC       1.40
  
```

Fig. S19 <sup>13</sup>C-NMR spectra of **II** DMSO-d<sub>6</sub>.



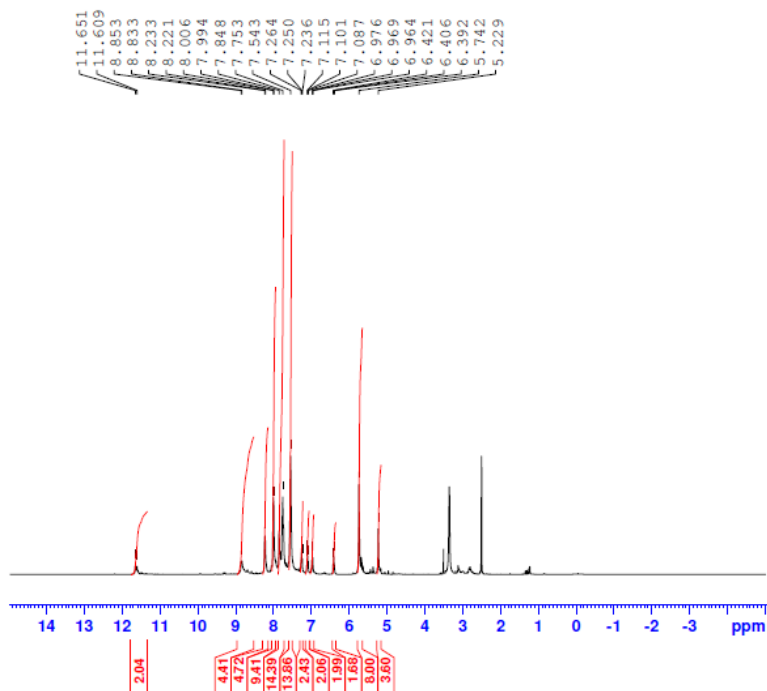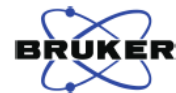

```

Current Data Parameters
NAME          ep51014
EXPNO        16
PROCNO       1

F2 - Acquisition Parameters
Date_        20141031
Time         20.12
INSTRUM      spect
PROBHD       5 mm PABBO BB/
PULPROG      zg30
TD           32768
SOLVENT      DMSO
NS           204
DS           2
SWH          10000.000 Hz
FIDRES       0.305176 Hz
AQ           1.6384000 sec
RG           101.5
LW           50.000 usec
DE           6.50 usec
TE           298.1 K
D1           0.50000000 sec
TDO          1

==== CHANNEL f1 =====
SFO1         500.1525008 MHz
NUC1         1H
P1           11.75 usec
PLW1         15.30000019 W

F2 - Processing parameters
SI           65536
SF           500.1500120 MHz
WDW          EM
SSB          0
LB           0.30 Hz
GB           0
PC           1.00
  
```

Fig. S20 <sup>1</sup>H-NMR spectra of **III** DMSO-d<sub>6</sub>.

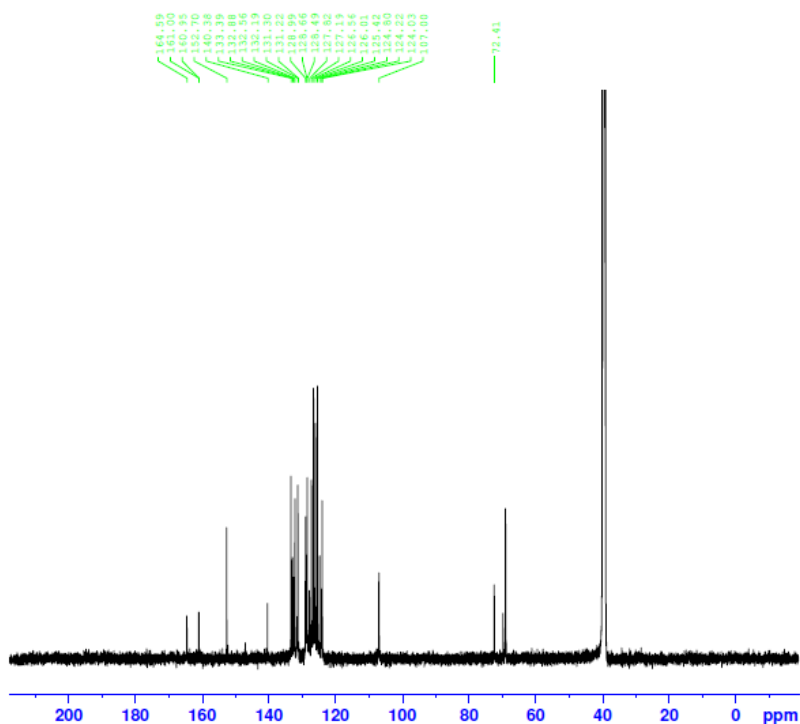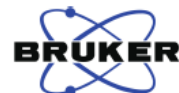

```

Current Data Parameters
NAME          ep51014
EXPNO        17
PROCNO       1

F2 - Acquisition Parameters
Date_        20141031
Time         22.13
INSTRUM      spect
PROBHD       5 mm PABBO BB/
PULPROG      zgpg30
TD           20480
SOLVENT      DMSO
NS           5120
DS           4
SWH          29761.904 Hz
FIDRES       1.453218 Hz
AQ           0.3440640 sec
RG           202.34
LW           16.800 usec
DE           6.50 usec
TE           298.1 K
D1           1.00000000 sec
D11          0.03000000 sec
TDO          1

==== CHANNEL f1 =====
SFO1         125.7753932 MHz
NUC1         13C
P1           9.63 usec
PLW1         103.00000000 W

==== CHANNEL f2 =====
SFO2         500.1520006 MHz
NUC2         1H
CPDPRG2      waltz16
PCPD2        80.00 usec
PLW2         15.30000019 W
PLW12        0.33006001 W
PLW13        0.21123999 W

F2 - Processing parameters
SI           32768
SF           125.7628831 MHz
WDW          EM
SSB          0
LB           1.00 Hz
GB           0
PC           1.40
  
```

Fig. S21 <sup>13</sup>C-NMR spectra of **III** DMSO-d<sub>6</sub>.

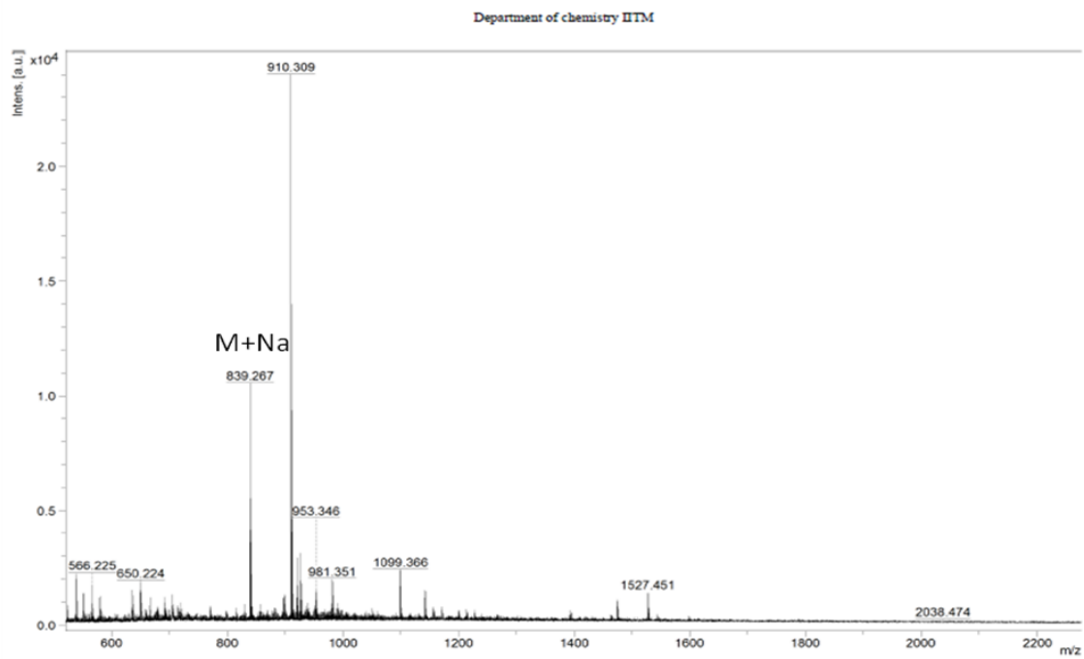

Fig. S22 MALDI-TOF of compound I.

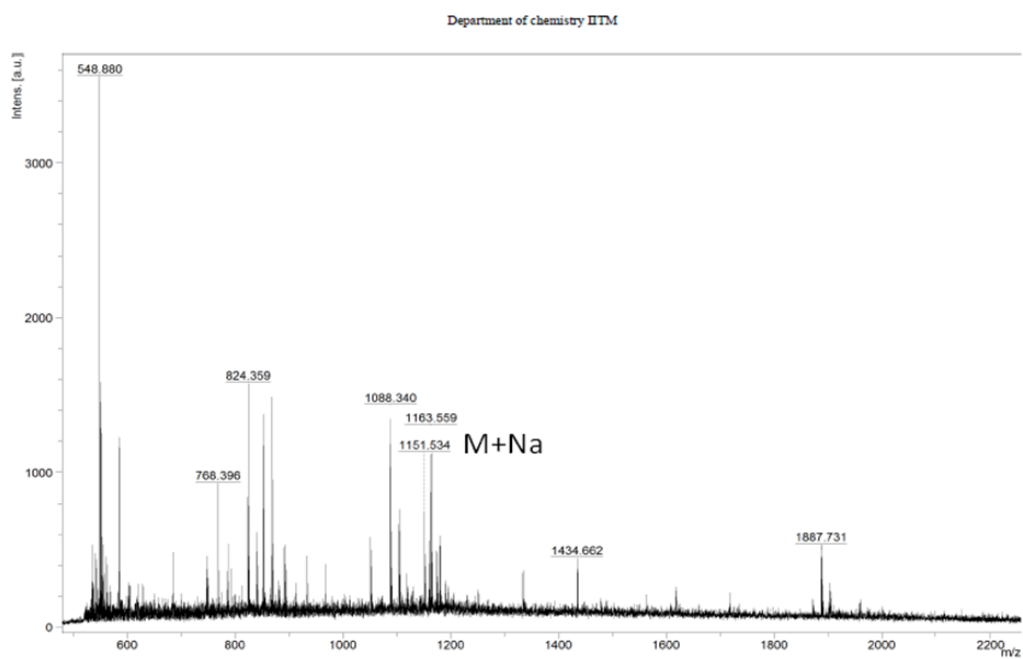

Fig. S23 MALDI-TOF of compound II.

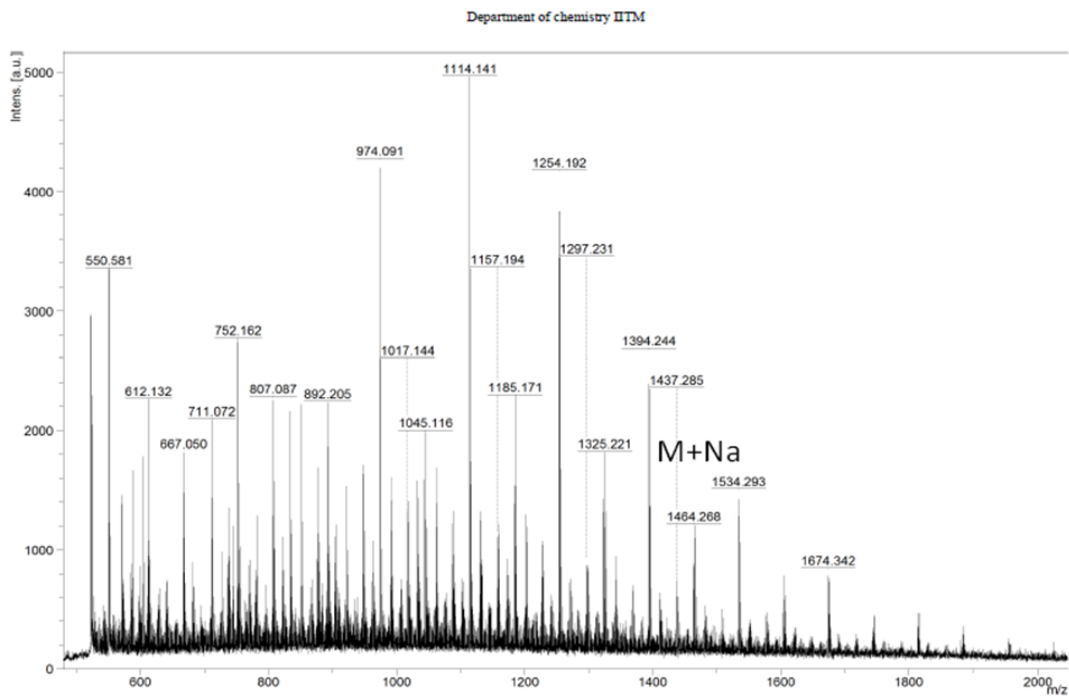

Fig. S24 MALDI-TOF of compound **III**.
